# Supplementary material
Source: PubMed Central journal article supplement (PMC4468684)

**TABLE S1** Antifungal agents included in the commercial versions of Sensititre YeastOne colorimetric panel used during the study period

| SYO version (year) <sup>a</sup> | Concentration range (expressed in µg/ml) for the indicated agent <sup>b</sup> : |            |             |             |             |                   |                    |                   |                   |
|---------------------------------|---------------------------------------------------------------------------------|------------|-------------|-------------|-------------|-------------------|--------------------|-------------------|-------------------|
|                                 | AMB                                                                             | FLU        | FLC         | ITC         | VRC         | POS               | CAS                | ANF               | MCF               |
| YO-06 (2005)                    | 0.008 to 16                                                                     | 0.03 to 64 | 0.03 to 64  | 0.008 to 16 | 0.008 to 16 | NA                | NA                 | NA                | NA                |
| YO-07 ( <b>2006</b> )           | 0.008 to 16                                                                     | 0.03 to 64 | 0.12 to 256 | 0.008 to 16 | 0.008 to 16 | NA                | <b>0.008 to 16</b> | NA                | NA                |
| YO-08 ( <b>2007</b> )           | 0.008 to 16                                                                     | 0.03 to 64 | 0.12 to 256 | 0.008 to 16 | 0.008 to 16 | <b>0.008 to 8</b> | 0.008 to 8         | NA                | NA                |
| YO-10 ( <b>2009</b> )           | 0.12 to 8                                                                       | 0.06 to 64 | 0.12 to 256 | 0.015 to 16 | 0.008 to 8  | 0.008 to 8        | 0.008 to 8         | <b>0.015 to 8</b> | <b>0.008 to 8</b> |

<sup>a</sup> The year since which each SYO version was available for antifungal susceptibility testing in the clinical microbiology laboratory is indicated in parentheses.

<sup>b</sup> The ketoconazole antifungal agent was available in all the SYO versions used, but it is not listed here because the minimum inhibitory concentration (MIC) data from this agent were not included in the study. Boldface denotes the entry of antifungal agents in the respective SYO versions.

SYO, Sensititre YeastOne; AMB, amphotericin B; FLU, flucytosine; FLC, fluconazole; ITC, itraconazole; VRC, voriconazole; POS, posaconazole; CAS, caspofungin; ANF, anidulafungin; MCF, micafungin. NA, not available.

**TABLE S2** Susceptibility results of the 36 less-common *Candida* and non-*Candida* isolates studied to nine antifungal agents

| Organism (no. tested)                     | MIC (µg/ml) to the indicated antifungal agent <sup>a</sup> |      |       |       |       |      |      |       |       |
|-------------------------------------------|------------------------------------------------------------|------|-------|-------|-------|------|------|-------|-------|
|                                           | AMB                                                        | FLC  | ITC   | VRC   | POS   | FLU  | CAS  | ANF   | MCF   |
| <i>Blastoschizomyces capitatus</i> (6)    | 1                                                          | 4    | 0.12  | 0.12  | 0.25  | 16   | >8   | 0.5   | 0.25  |
| <i>B. capitatus</i>                       | 0.03                                                       | 8    | 0.12  | 0.12  | 0.25  | 0.25 | >8   | 1     | 1     |
| <i>B. capitatus</i>                       | 0.06                                                       | 2    | 0.06  | 0.03  | 0.12  | 0.12 | 4    | 0.5   | 1     |
| <i>B. capitatus</i>                       | 0.25                                                       | 16   | 0.25  | 0.25  | 0.5   | 0.5  | 32   | ND    | ND    |
| <i>B. capitatus</i>                       | 0.5                                                        | 2    | 0.06  | 0.008 | ND    | 0.12 | 16   | ND    | ND    |
| <i>B. capitatus</i>                       | 0.5                                                        | 8    | 0.12  | 0.06  | 0.12  | 0.12 | 8    | 0.5   | 0.5   |
| <i>Rhodotorula rubra</i> <sup>b</sup> (4) | 0.06                                                       | 128  | 0.5   | 0.5   | ND    | 0.06 | 16   | ND    | ND    |
| <i>R. rubra</i>                           | 0.12                                                       | 32   | 0.5   | 0.5   | 0.06  | 0.06 | 8    | 8     | 8     |
| <i>R. rubra</i>                           | 0.5                                                        | 8    | 1     | 1     | 4     | 0.06 | 8    | ND    | ND    |
| <i>R. rubra</i>                           | 0.5                                                        | 128  | 2     | 2     | 1     | 1    | 8    | 8     | 8     |
| <i>Rhodotorula mucilaginosa</i> (3)       | 0.5                                                        | 64   | 0.25  | 0.12  | 1     | 0.03 | >8   | >8    | >8    |
| <i>R. mucilaginosa</i>                    | 1                                                          | 128  | 0.5   | 0.25  | 1     | 0.06 | >8   | >8    | >8    |
| <i>R. mucilaginosa</i>                    | 2                                                          | 64   | 0.5   | 0.5   | 0.5   | 0.06 | >8   | >8    | >8    |
| <i>Rhodotorula dairenensis</i>            | 1                                                          | 128  | 0.5   | 0.25  | 1     | 0.12 | >8   | >8    | >8    |
| <i>Rhodotorula glutinis</i>               | 0.5                                                        | 64   | 1     | 1     | 0.5   | 0.03 | ND   | ND    | ND    |
| <i>Candida famata</i> (4)                 | 0.12                                                       | 4    | 0.25  | 0.06  | ND    | 0.03 | ND   | ND    | ND    |
| <i>C. famata</i>                          | 0.06                                                       | 4    | 0.25  | 0.12  | ND    | 0.06 | 2    | ND    | ND    |
| <i>C. famata</i>                          | 0.03                                                       | 2    | 0.25  | 0.03  | ND    | 0.03 | 1    | ND    | ND    |
| <i>C. famata</i>                          | 0.25                                                       | 1    | 0.25  | 0.015 | 0.12  | 0.06 | 0.25 | 1     | 0.25  |
| <i>Candida rugosa</i> (3)                 | 0.06                                                       | 2    | 0.06  | 0.03  | ND    | 0.12 | 0.25 | ND    | ND    |
| <i>C. rugosa</i>                          | 0.06                                                       | 1    | 0.015 | 0.008 | ND    | 0.03 | 0.12 | ND    | ND    |
| <i>C. rugosa</i>                          | 0.06                                                       | 4    | 0.06  | 0.06  | 0.06  | 0.03 | 0.12 | ND    | ND    |
| <i>Candida dubliniensis</i> (2)           | 0.015                                                      | 0.12 | 0.008 | 0.008 | ND    | 0.03 | ND   | ND    | ND    |
| <i>C. dubliniensis</i>                    | 0.25                                                       | 0.12 | 0.015 | 0.008 | 0.015 | 0.06 | 0.03 | 0.03  | 0.008 |
| <i>Candida lipolytica</i> (2)             | 0.25                                                       | 8    | 0.25  | 0.12  | 0.5   | 2    | 0.5  | 0.5   | 0.5   |
| <i>C. lipolytica</i>                      | 1                                                          | 1    | 0.06  | 0.015 | 0.25  | 4    | 0.5  | 0.25  | 0.5   |
| <i>Candida pelliculosa</i> (2)            | 0.06                                                       | 2    | 0.12  | 0.03  | ND    | 0.03 | 0.06 | ND    | ND    |
| <i>C. pelliculosa</i>                     | 1                                                          | 4    | 0.25  | 0.12  | 1     | 0.06 | 0.06 | 0.015 | 0.03  |
| <i>Candida utilis</i> (2)                 | 0.25                                                       | 2    | 0.5   | 0.12  | 1     | 0.06 | 0.06 | 0.015 | 0.03  |
| <i>C. utilis</i>                          | 0.25                                                       | 2    | 0.12  | 0.06  | 0.25  | 0.06 | 0.03 | 0.015 | 0.03  |
| <i>Candida intermedia</i>                 | 0.5                                                        | 0.5  | 0.03  | 0.008 | 0.03  | 0.06 | 0.5  | 0.06  | 0.03  |
| <i>Candida kefyr</i>                      | 0.06                                                       | 0.12 | 0.06  | 0.008 | ND    | 1    | 0.06 | ND    | ND    |
| <i>Candida lambica</i>                    | 0.06                                                       | 2    | 0.12  | 0.03  | ND    | 0.06 | 2    | ND    | ND    |
| <i>Candida norvegensis</i>                | 0.5                                                        | 16   | 0.25  | 0.12  | 0.25  | 4    | 0.12 | 0.06  | 0.12  |
| <i>Saccharomyces cerevisiae</i>           | 0.03                                                       | 4    | 0.25  | 0.06  | 0.25  | 0.03 | 0.06 | ND    | ND    |
| <i>Trichosporon asahii</i>                | 1                                                          | 2    | 0.25  | 0.06  | 0.25  | 8    | >8   | >8    | >8    |

<sup>a</sup> AMB, amphotericin B; FLC, fluconazole; ITC, itraconazole; VRC, voriconazole; POS, posaconazole; FLU, flucytosine; CAS, caspofungin; ANF, anidulafungin; MCF, micafungin. Minimum inhibitory concentration

(MIC) was not determined (ND) for posaconazole in 11 occasions, for caspofungin in 4 occasions, and for both anidulafungin and micafungin in 16 occasions (see text for explanation).

<sup>b</sup> The four isolates of *R. rubra* are named as *R. mucilaginosa* in the text, according to the current taxonomic nomenclature.

**FIG S1** MIC ( $\mu\text{g/ml}$ ) distributions of caspofungin against most common *Candida* species obtained with the Sensititre YeastOne.

*C. albicans*

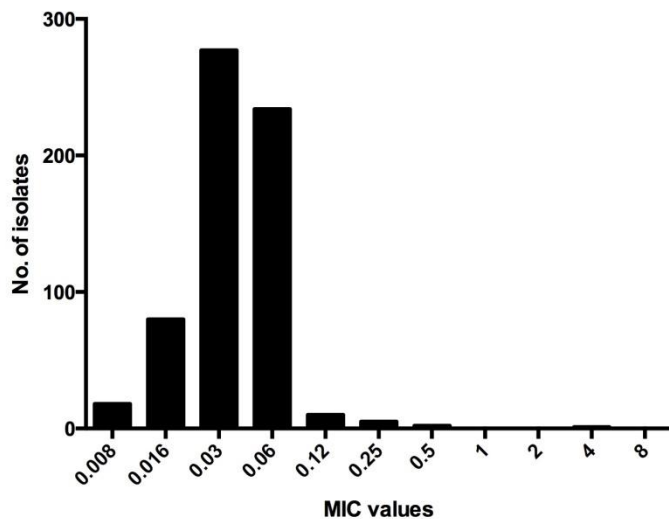

*C. parapsilosis*

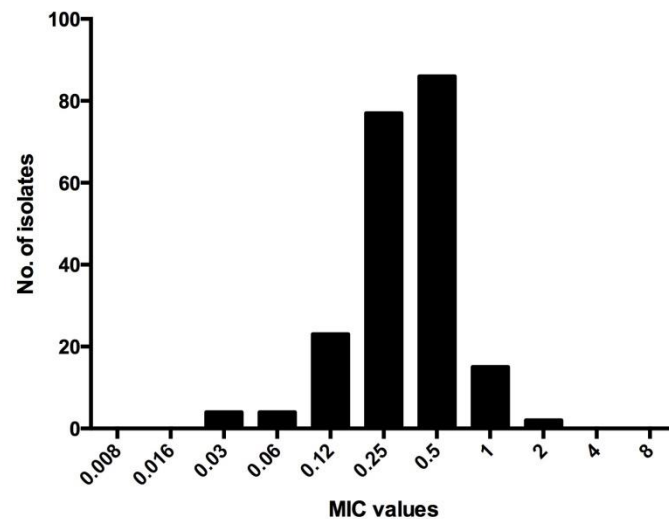

*C. glabrata*

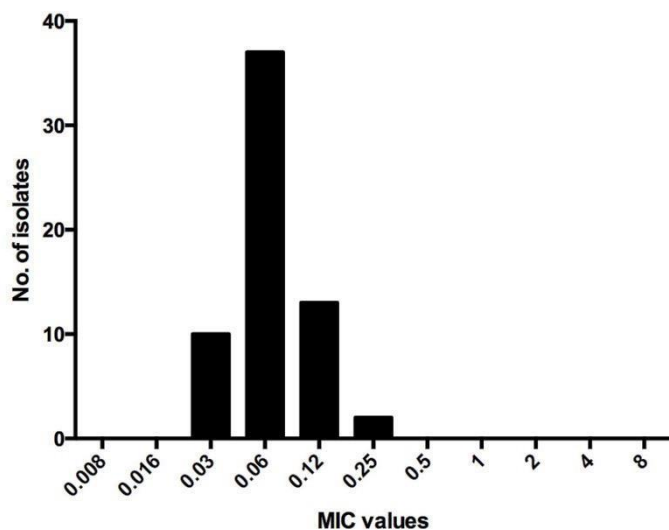

*C. tropicalis*

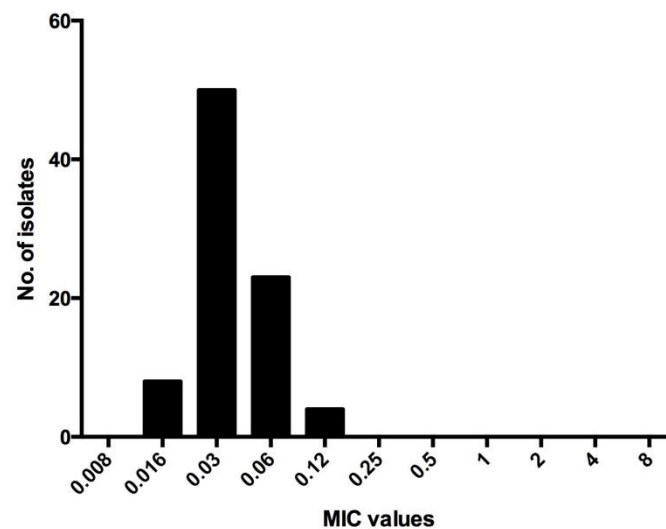

Supplement: AAC.00285-15_zac007154112so1.pdf [file AAC.00285-15_zac007154112so1.pdf]
